# Supplementary figures and images for: A game for all shapes and sizes? Changes in anthropometric and performance measures of elite professional rugby union players 1999–2018
Source: HighWire-hosted journal article supplement (doi:10.1136/bmjsem-2021-001235), 2022-02-01

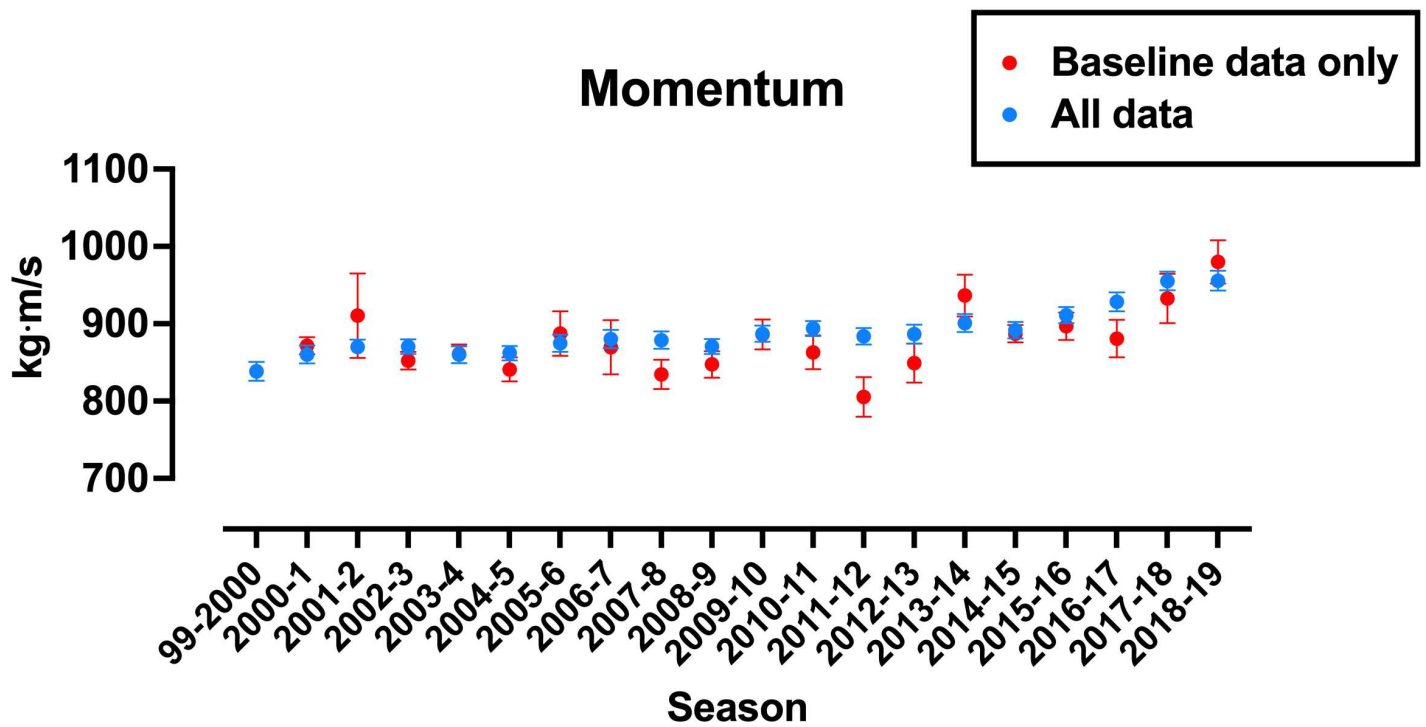

Supplement: bmjsem-2021-001235supp001_data_supplement.pdf [file bmjsem-2021-001235supp001_data_supplement.pdf]

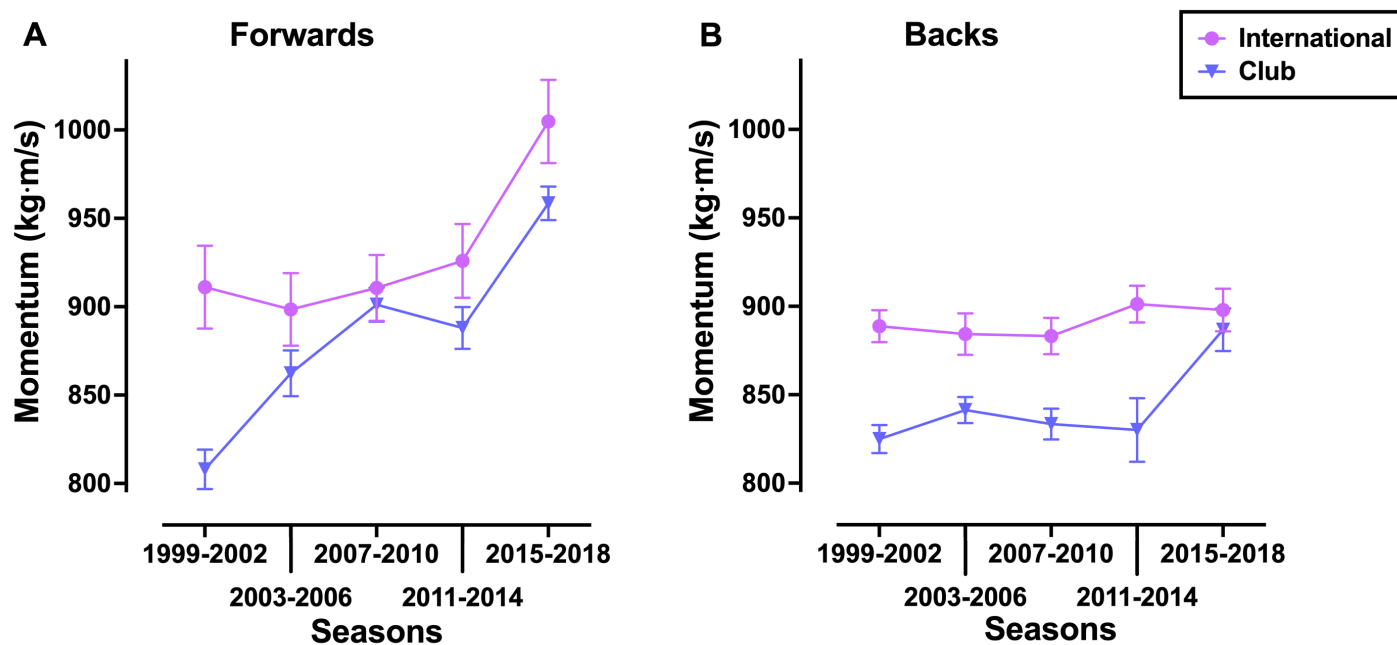

Supplement: bmjsem-2021-001235supp002_data_supplement.pdf [file bmjsem-2021-001235supp002_data_supplement.pdf]
